# Supplementary material for: Promoter-Bound Full-Length Intronic Circular RNAs-RNA Polymerase II Complexes Regulate Gene Expression in the Human Parasite Entamoeba histolytica
Source: MDPI journal article supplement (doi:10.3390/ncrna8010012), 2022-01-27
Supplement: s1 [file s1]

## Supplementary Figures

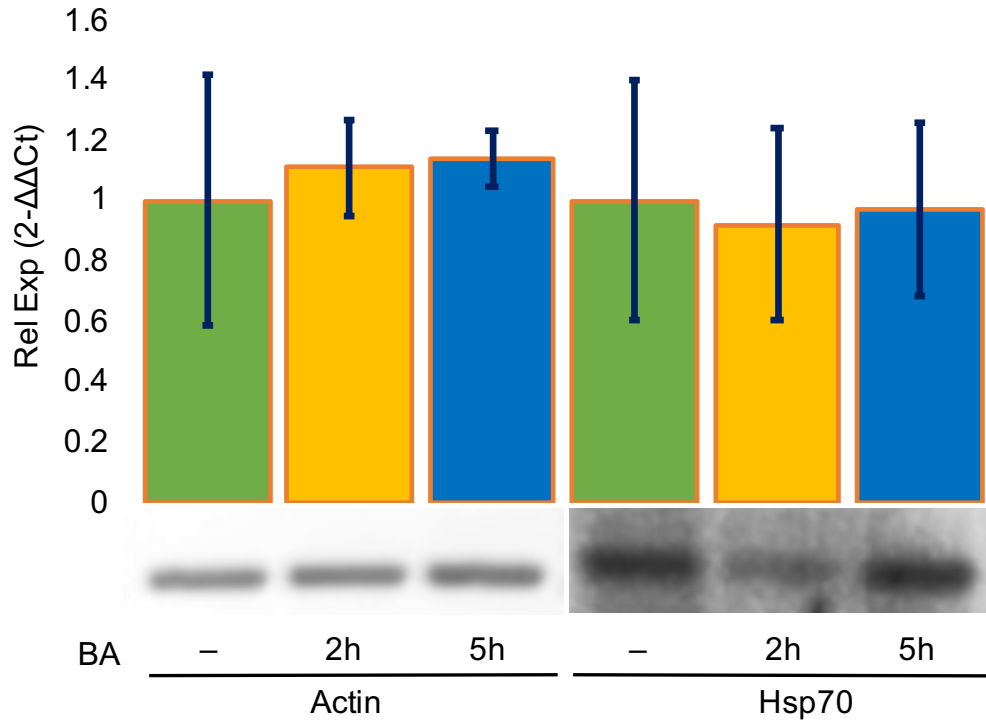

**Figure S1. Boric Acid treatments do not affect the transcription of housekeeping genes.** *E. histolytica* trophozoites were incubated in 5 mM  $H_3BO_3$  for 2 or 5 h. RNA was extracted, and Actin and Hsp70 were amplified, visualized, and analyzed by qRT-PCR. Relative expression is compared to one in the HA control without BA. Expression profiles are statistically non-significant (ANOVA and Turkey test *a posteriori*). Standard deviations are shown as thin blue bars. Representative electrophoretic images of PRC products are shown.

**Figure S2. Identification of TIA-1 binding motifs on flicRNA sequences from *Entamoeba histolytica*.**

Selected homolog motifs: TIA1(Hs/Mm): uuuuubk, TIA1(Hs/Mm): uuuuuu.

Stringency level: High, conservation filter: On

(Paz I, Kosti I, Ares M, Jr., Cline M, Mandel-Gutfreund Y. RBPmap: a web server for mapping binding sites of RNA-binding proteins. Nucleic acids research. 2014;42(Web Server issue):W361-7. Epub 2014/05/16. DOI: 10.1093/nar/gku406. PubMed PMID: 24829458; PubMed Central PMCID: PMC4086114)

**flicX13**

| Sequence Position | Motif   | K-mer   | Z-score | P-value    |
|-------------------|---------|---------|---------|------------|
| 27                | uuuuuu  | uuuuua  | 2.523   | 5.82e-03 * |
| 61                | uuuuubk | auuuugu | 2.598   | 4.69e-03 * |
| 111               | uuuuuu  | uuuuua  | 1.947   | 2.58e-02 * |

**flic670i1**

| Sequence Position | Motif  | K-mer  | Z-score | P-value    |
|-------------------|--------|--------|---------|------------|
| 70                | uuuuuu | uuuuua | 2.561   | 5.22e-03 * |

### **flic670i2**

| =====             |         |         |         |            |
|-------------------|---------|---------|---------|------------|
| Sequence Position | Motif   | K-mer   | Z-score | P-value    |
| 83                | uuuuu   | uuuuu   | 2.606   | 4.58e-03 * |
| 148               | uuuuubk | auuuuuu | 3.422   | 3.11e-04 * |
| 149               | uuuuubk | uuuuuuu | 3.735   | 9.39e-05 * |
| 150               | uuuuubk | uuuuuug | 3.843   | 6.08e-05 * |
| 151               | uuuuubk | uuuuugu | 3.539   | 2.01e-04 * |

### **flic510**

| =====             |       |       |         |            |
|-------------------|-------|-------|---------|------------|
| Sequence Position | Motif | K-mer | Z-score | P-value    |
| 77                | uuuuu | uuuuu | 1.917   | 2.76e-02 * |
| 179               | uuuuu | uuuuu | 3.227   | 6.25e-04 * |
| 180               | uuuuu | uuuuu | 3.227   | 6.25e-04 * |
| 181               | uuuuu | uuuuu | 3.061   | 1.10e-03 * |
| 202               | uuuuu | uuuuu | 3.061   | 1.10e-03 * |

### **flic170**

| =====             |         |         |         |            |
|-------------------|---------|---------|---------|------------|
| Sequence Position | Motif   | K-mer   | Z-score | P-value    |
| 26                | uuuuu   | uuuuu   | 2.947   | 1.60e-03 * |
| 50                | uuuuubk | auuuucu | 2.667   | 3.83e-03 * |

|     |         |         |       |            |
|-----|---------|---------|-------|------------|
| 117 | uuuuubk | auuuuug | 3.206 | 6.73e-04 * |
| 118 | uuuuubk | uuuuugu | 3.176 | 7.47e-04 * |
| 181 | uuuuu   | uuuuu   | 2.871 | 2.05e-03 * |
| 182 | uuuuu   | uuuuu   | 2.758 | 2.91e-03 * |

### Supplementary Figure S3.

Identification of promoter elements in *Entamoeba histolytica* genes.

Inr: Initiator

RabX13 EHI\_065790

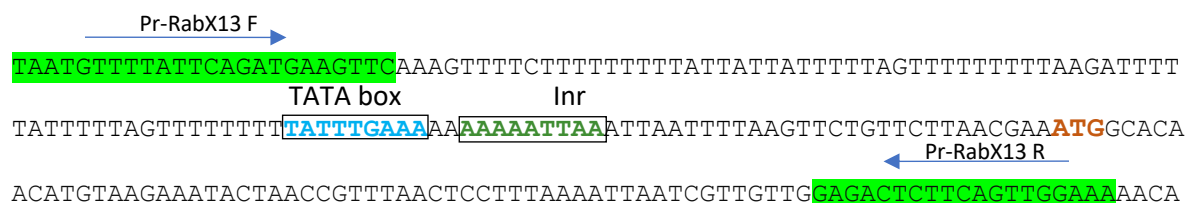

EHI\_169670

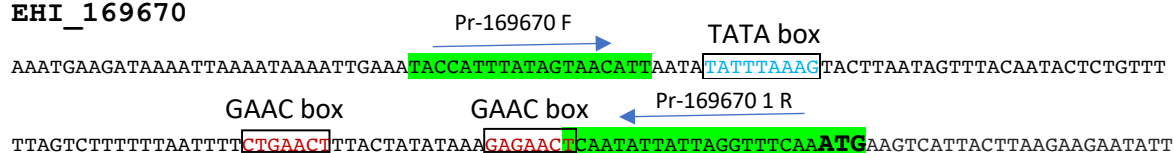

## EH1\_014170

CAACAATGTATATTGCTCCAACCAATGACTTTAGTGCTATTGATTCTTATATAACCTTAAACCAACTTC  
Pr-014170A F

AGAACAACCTCATCTACGCTGTTTAAGAAAATCACTATTCATTTCAAACAACAACACTGTCACTCA  
Pr-014170B F GAAC box  
GTCCATATTGTTTCATTATTACTTCTGAAGAAGCTTTATCTGATGTAGTTTAAAGACAAAAGAACTTC

AAACATTACGTAGTTATCACGTTCAATTTGTTTTATTAGGAGATGTATTAAATCCATTAAGCCATACCCG  
Pr-014170A R  
TTCCTTAGTTCGTTCTTTGGTTAACGACAAAGTCGTGGATGGGGAGTAACTGAAAACGATTTAACAAAA

ACAAATCCTTATGAGCGTTTAATGATGAGAATGTCTGAAGGCATTATCATTTTGCCTCGTCGTAAAGTAT  
Pr-014170D F  
TAAAACAATTACCTCATATGAGAGCTGGACAAGTTCGTGTGAAAGTAAAGCTGGCAAATTTATTTTCATG

TAAAGTAATTACACATATGACAAATGATACAGTTTCAATGATTCCAGTACCAATTATTTCTAAACAAAAG  
Pr-014170B R  
AATTTAAGCACTATCAGATGTGGTAAATCAAATATAGTTGATGGAAAATGTGTGTCTTCAGAAGAACGAG

GAATGCTTTTCTTGGTTGAATTATCTCCGATTTTATTTAAATTGATTGGAAAACCGAAAATGAGATAGA  
TATA box  
Pr-014170E F  
CCATTGACAATATTTTATGGTGAGACAAGTTGTAAGCAGATAAAAAAGGTAAATATAACTTCTTAATT

TTTGAAAGGTAATAAACCAAATGGTAGTCTTACTAAAACAATTTATTGGACTACTTTGGATACAAAAGAAT  
Pr-014170D R

TTTGACGGTTTTTGAAAAAGCTATGAGTCAAGATGTCCACAAAATTATATAAAAATTATGCAAACTAT  
TTGGAATGATAATAAGAAGACATTAAGTAGTATGGAAGAAAAATATATGAGTATGAAGAGGGAAAAAGAA  
Pr-014170F F Pr-014170E R  
ATTGTGAACAAAATGGATGAATATGTAAAAGGTGTTCTTAAACAGAACTAAATAGAAAAGTAAGAAATG

AAGCTGATAAAAAACAGAACCAAAAGAGCCAAGTACTAATTAATAAATAAAATGTCCAAATTTTTTGCT  
AATCATTCACGTACATTTATTTTTTTGTTATTTAATAACTGGTTAATTTTGTATTAGGAAAAGAATAATA  
Pr-014170G F  
AAATAAGCACTTAATTAAATGTTAATAAACTCTATTTTTTTTATTCCTTGTTCAAGTGACACAAATCCTG

TCTTTTATCTTATTTTTTTTATTAGGAAAAGAAAAAGAGAAAAAATAACAAAATAAAATAATAAAAAAT  
TATATATAAATGTAATTTTTATTTGAAGAAAGGAAAAGAAAGTCAAAAATTTTGTAAATAAAA **TATA box**  
**Pr-014170F R**  
**AAAT**GAAACGAATACGATTAAAAGAAGTTAAGGAATGTTGAGTCATACTAACGTAATACAGAAAAGAAGAA  
**Inr**  
GAGATCTTGAAATT **AAAAAAGGAATA** AAGA **ATG**AAATCATTATTAAAGAAGAAATATTAAACAAGACTATA  
**Pr-014170G R**  
CCATTGAATTTAAACATATTAAAG **SACTAGATATTGGAGACAATA** TTGAAGTTGTTTTAAATGGAGAAG

## EHI\_192510

**Pr-192510A F** **GAAC box**  
AAA **ATGGTTACGCTTGAATG** AGGGGTG **ATATGAACT** TTCTCGCAAATATTTCCATGACGACAAGATCCAA  
**Pr-192510B F**  
CTTTAGAGAAGAACTCACAGAGA **TTGAGACTTTCCATCAATAACT** AAAAACTATTTTTCGTTTTGACAAT  
**TATA box**  
TTTTAATTTTTTAATTTTTTTATCAGAGTTTTAAATTATTAATTTT **TTTAAAG** AATGATGTCTCAGTTTTT  
**Inr** **Inr**  
TTAATAAAAAGTGAACATCTGCTAA **AAAAATTAA** GAT **AAATTTCAT** TTAATA **ATG** TCTTCTCAAAAAA **TA**  
**Pr-192510A R** **Pr-192510B**  
**GTTAGTGTGGAATTGAT** TTAGGAACTACTTGTTGTTATGT **TGCTTGTATTGAAGATGGTAAT** GAACCAA  
AAATACTTCTAATGAATAATGAAGACTATTTACCTTCATGGATTTCTCTTTCAAATGTTAAGAATGGTTT

## EhRNF EHI\_098590

**Pr-098590 F**  
AAT **TAAACAAGATTCTCCAGGTG** TTGATTGGTCAATTTCAATCTATTCTGACAAAGAAAAAGATCCTTCA  
**TATA box**  
TTTTATAATGTTTATCAGTGTTTACATTACGTC **CACCTTTAAAC** CAACACAACATCATTAATCCTG  
AATTTAAATTTGAGTATGAAAATGCTATTGATGTTAGTGCGTTTACTGGAAATAAAGAAAACTTTGCAGT  
AAAACGATTATTTTCTTCAATGGTATCAATAAACTTTGTAATTTTTTATTCACATTTTCTTATTATT  
**Inr** **GAAC box**  
TTGTT **AAAAATTCT** GTTGAATAATAAAAGGGGAAAAA **AAGAACT** TATTTTTTTTATTCTTTATCTTTTT  
**Pr-098590 R**  
CTT **ATG** GGTGCTGAACCTTCAAAAC **CAGTTATTTCTAATGATGTTAATAGAA** TGTGTTCAACTATTACAG

## EhNudC EHI\_023890

TATTAAATCATCCAAACATTAAGAATTTGCCAAAAGCAATTATTTGTGCAGAGGAGACTTTGTTTTGGAGATACCAAAATA  
P-nudc S 500  
TAAGTAATACTAACTTATCAACTATTGAGGCTATCTATTATTTTATAGAGATTATTATACTTGTATGAATGGTAAATATA  
ATGGAGAATGTGATGATCTTTTATATTTCTTCACCCATATTTATCATCGTGTCCAAGACTTTTATAACGAACATCCAGATA  
AAACGTTTCATCCACAAAGATGGATATATTCAATACAAAACACCAGAGCTTGAAAAACAAAAGAAGAATACAAAAGA  
P-nudc S 250  
GGGAAGAGATGATTGAATCTAAAAACAATCTAAAGCACAAAAATAATTAAATATTTTGTATTTTAAATGGTTTGCAT  
P-nudc AS 250  
TACTCTTATAATTTTTTTTAAAGAACAAAAAGAATGAAGAAAGATTAAATGTTGTTTCGTATTAATAATCTCAATCACAA  
GAAC box  
TGAACAAGTTGGTACTAAAAATCTAAAAAGAAAAAGGATGATCATCACCATGTCAGTCCACGTCATTTCATTTCGTGAAAG  
TATA box Inr P-nudc As1  
ATAATATTTTAAACATAGAACTTAGACAAAAAAACAATTCGTTGCGTTATGGCTGGATGGAACCATCTCCTTATGTTAA  
TATGGATATACCGAAAAGAAGTATAAATGGACTCAGACACCTGAAGATGTAAACATTAACAATAGAATTACCTGATGAAAA  
TTAAAAACAAAAACAGATATTCAAATAATAATGAAAACAAATAAATTTGAAATGATTATTAAAGGAGAAGTTTATATTGGA  
GGAGAATTAGAACATGCTATTAATGTAGATGATTCTACATGGACT

## EhSMC EHI\_187190

TAAACAAAATGAAAAATTTGCCCAATAATTTAATTAAAGAGAATGCCATGAATGAAAAATGATCCAATAAATAACGTTA  
TTCCAATTATATAAATAATTGCAGTTTCTACTTATAAATTATAATTCAATCAATTAAATAAAATATACAACTTTTATCT  
GACATTGTTGTAAATCAGGAAATCCTAAGTAATTTGCAACTGCATGGCATAAAATGCATGAAATTACAGATTTTGTACTG  
AAGAAAACATATGACGAATACATTCCAAATAATGTAGTAAATCCTACTTGTATCATTGTATTGATGATAGCAGCTTTATCA  
ATAACATCTTCTGTTATTAGGTGGTTGATGTGTGCAAGTCCAAAAGCATTGAACAATAGATAAATGTAAATATTGATGTG  
P-smc S 500  
CATCCGTTTGTCAACAGGTATGGTATAAACACTCCTCTAAATAATGTTTCTTCAATTATTGGTGCAACAACAAGTGCCCGT  
ATGATGAAAAGTGAATTAGGACAATATATTGATCAGTTTGTGATAAACACAATATATAAATCCAATAAAAAGAATGACG  
ATTTGGGTTAGATGAAATAACGTTGATAAACAGGAATATTAAAGTTAAGAGGGACATCAAGAATAATAGTGACAAATACA  
P-smc S 250  
CAATATCCTATTCCAAATGATCATTCTTATTATTGCTATTTTATTTTCGTCATTTATCTATGTGAAGCTATACCCAAAAA  
P-smc AS 250 TATA box  
GCAAGAAGAATGACTGTCAATGTTAATGTTATGATAATACTCATAAACCATCCAACAATAATCATTAAACATATAAATTAT  
Inr P-smc As1  
GTATTTGTTTTTTTTTAATTTCCAAATAAAGTGATAGTAATAAATATAGTAAATTTGCTATAATTTACTACTATAAACT  
ATATAATAAAAATGAAAAATAAACCATCATTACATGGATAAGACTCAATCTGATGTGCTTGCTCACTTCCTTGAACAGGAA  
CTAAGTGTGACCAAAAAGTAAAGAGGATACAAAGAAAGGTAGCAGAGTATATGAAAACTATAATTATGATGAATATGTA

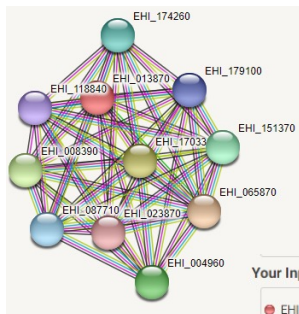

**EHI\_013870 (METTL3 ortholog):** rRNA adenine N(6)-methyltransferase;  
Dimethyladenosine transferase

#### Your Input:

EHI\_013870 rRNA adenine N(6)-methyltransferase; Dimethyladenosine transferase, putative; Belongs to the class I-like SAM-binding methyltransferase superfamily. rRNA adenine N(6)-methyltransferase family (295 aa)

#### Predicted Functional Partners:

|            | Neighborhood                                                              | Gene Fusion | Cooccurrence | Coexpression | Experiments | Databases | Textmining | (Homology) | Score |
|------------|---------------------------------------------------------------------------|-------------|--------------|--------------|-------------|-----------|------------|------------|-------|
| EHI_065870 | Rna-binding protein pno1; RNA-binding protein, putative                   |             |              | •            | •           | •         |            |            | 0.996 |
| EHI_170330 | RIO1 family protein                                                       |             |              | •            | •           | •         |            |            | 0.996 |
| EHI_008390 | Pre-rna-processing protein tsr1; Uncharacterized protein                  |             |              | •            | •           | •         |            |            | 0.995 |
| EHI_004960 | Essential nuclear protein 1; Bystin, putative                             |             |              | •            | •           | •         |            |            | 0.994 |
| EHI_151370 | Periodic tryptophan protein 2; WD domain containing protein               |             |              | •            | •           | •         |            |            | 0.994 |
| EHI_174260 | Hypothetical protein; Uncharacterized protein                             |             |              | •            | •           | •         |            |            | 0.994 |
| EHI_087710 | Rna-binding protein nob1; Belongs to the NOB1 family                      |             |              | •            | •           | •         |            |            | 0.991 |
| EHI_179100 | U3 small nucleolar RNA-associated protein 22; Uncharacterized protein     |             |              | •            | •           | •         |            |            | 0.989 |
| EHI_118840 | Rma 2'-o-methyltransferase fibrillarin; Fibrillarin, putative             |             |              | •            | •           | •         |            |            | 0.988 |
| EHI_023870 | U3 small nucleolar RNA-associated protein 4; WD domain containing protein |             |              | •            | •           | •         |            |            | 0.982 |

#### Your Current Organism:

Entamoeba histolytica  
NCBI taxonomy Id: 5759  
Other names: E. histolytica

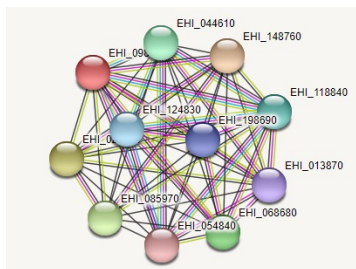

**EHI\_098730:** Trna (cytidine32/guanosine34-2'-o)-methyltransferase;  
Ribosomal RNA methyltransferase

#### Entamoeba histolytica protein-protein associations

associations are meant to be specific and meaningful, i.e. proteins jointly contribute to a shared function; this does not necessarily mean they are physically binding to each other.

#### Known Interactions

from curated databases  
experimentally determined

#### Predicted Interactions

gene neighborhood  
gene fusions  
gene co-occurrence

#### Others

textmining  
co-expression  
protein homology

#### Your Input:

EHI\_098730 Trna (cytidine32/guanosine34-2'-o)-methyltransferase; Ribosomal RNA methyltransferase, putative (231 aa)

#### Predicted Functional Partners:

|            | Neighborhood                                                                                                               | Gene Fusion | Cooccurrence | Coexpression | Experiments | Databases | Textmining | (Homology) | Score |
|------------|----------------------------------------------------------------------------------------------------------------------------|-------------|--------------|--------------|-------------|-----------|------------|------------|-------|
| EHI_148760 | Trna (guanine26-n2/guanine27-n2)-dimethyltransferase; N2,N2-dimethylguanosine tRNA methyltransferase, putative             |             |              | •            | •           | •         |            |            | 0.988 |
| EHI_023130 | Trna (guanine10-n2)-methyltransferase; Uncharacterized protein                                                             |             |              | •            | •           | •         |            |            | 0.987 |
| EHI_085970 | Trna (adenine58-n1)-methyltransferase non-catalytic subunit; Uncharacterized protein                                       |             |              | •            | •           | •         |            |            | 0.986 |
| EHI_068680 | Nucleolar phosphoprotein Nopp34, putative                                                                                  |             |              | •            | •           | •         |            |            | 0.979 |
| EHI_044610 | Rma small subunit pseudouridine methyltransferase nep1; Ribosome biogenesis protein NEP1, putative                         |             |              | •            | •           | •         |            |            | 0.976 |
| EHI_118840 | Rma 2'-o-methyltransferase fibrillarin; Fibrillarin, putative                                                              |             |              | •            | •           | •         |            |            | 0.976 |
| EHI_124830 | Hypothetical protein; Uncharacterized protein                                                                              |             |              | •            | •           | •         |            |            | 0.974 |
| EHI_198690 | MAK16 protein, putative; Belongs to the MAK16 family                                                                       |             |              | •            | •           | •         |            |            | 0.971 |
| EHI_013870 | rRNA adenine N(6)-methyltransferase; Dimethyladenosine transferase, putative; Belongs to the class I-like SAM-binding m... |             |              | •            | •           | •         |            |            | 0.965 |
| EHI_054840 | U3 small nucleolar RNA-associated protein 5; Uncharacterized protein                                                       |             |              | •            | •           | •         |            |            | 0.962 |

**Figure S4. String analysis of loci EHI\_013870 and EHI\_098730.** Protein products of these loci were identified as members of pre-mRNA ribonucleoparticles [Valdés *et al.*, Proteomic analysis of *Entamoeba histolytica* *in vivo* assembled pre-mRNA splicing complexes. J Proteomics. 2014]. Whereas only locus EHI\_013870 codes for the METTL ortholog involved in adenine N(6)-methyltransferase, locus EHI\_098730 codes for a tRNA (cytidine32/guanosine34-2'-o)-methyltransferase, but its predicted protein-protein interactions show association with the EhMETTL ortholog.



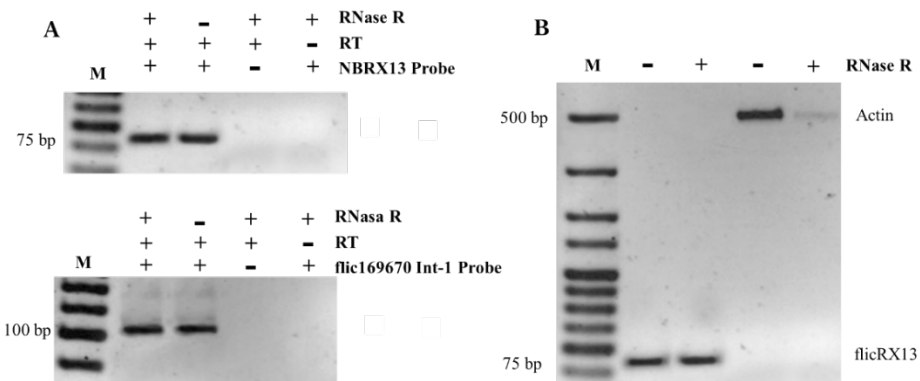

**Figure S5. Validation of flicRNAs with RNase R treatment.** (A) Primers that span the 5'-3'ss junctions were used to identification flicRX13 and flic670i1 by divergent RT-PCR with purified RNA treated with RNase R. Amplicons were resolved in 2.5% agarose gel. (B) Analysis of linear RNA degradation efficiency by exoribonuclease R. Amplification of the constitutive transcript Actin versus flicRX13 from treated RNA was compared. M, molecular weight marker.
