# Supplementary material for: Promoter-Bound Full-Length Intronic Circular RNAs-RNA Polymerase II Complexes Regulate Gene Expression in the Human Parasite Entamoeba histolytica
Source: MDPI journal article supplement (doi:10.3390/ncrna8010012), 2022-01-27
Supplement: s1 [file s1]

**Table S2.** Genes (Gene Accession), oligonucleotides and conditions are described in the main text. Amplifications were done at 35 and 38 cycles. US, unspliced; S, spliced variants, respectively.

| Genes                         | Oligonucleotides   |                                                       | PCR conditions                                  |
|-------------------------------|--------------------|-------------------------------------------------------|-------------------------------------------------|
|                               | Name               | Sequence (5' → 3')                                    |                                                 |
| <i>RabX13</i><br>(EHI_065790) | Rab2 F             | CGTTGTTGGAGACTCTTCAGTTGG                              | 94°C,45"; 60°C,45";<br>72°C,45"                 |
|                               | Rab2 R             | GACCCATTTTCAGTTGAAACAGTTC                             |                                                 |
|                               | Rab2BSs            | GATGAGATGAGATAAGATTTTATC                              | 94°C,45"; 55°C,45";<br>72°C,30"                 |
|                               | Rab2BSas           | CCGAATTACTGTCTTGAAATC                                 |                                                 |
|                               | NBRX13             | CTTTTAAAGTATTTAAACAAACCTAAATAAAA<br>GTTAGTTTATATTTATT | 94°C,45"; 55°C,45";<br>72°C,30"                 |
|                               | Pr-RabX13 F        | TAATGTTTTATTTCAGATGAAGTTC                             |                                                 |
|                               | Pr-RabX13 R        | TTT CCA ACT GAA GAG TCT C                             | 94°C,45"; 58°C,45";<br>72°C,45"                 |
|                               | Rab2Rex 2          | TTGAACACCACGATAATAACTAGT                              |                                                 |
| <i>mpL12</i><br>(EHI_191750)  | L12BSs             | GATACTTTATAACAATATTTTGGTGG                            | 94°C,45"; 56°C,45";<br>72°C,30"                 |
|                               | L12BSas            | GAATACTTTAATAACGTATGGATG                              |                                                 |
| <i>mpS14</i><br>(EHI_074090)  | S14BSs             | TTAACAAATGAAGTTGTTTAAAC                               | 94°C,45"; 51°C,45";<br>72°C,30"                 |
|                               | S14BSas            | AATGAAATGTGTAGTGTAACAAAC                              |                                                 |
| <i>Clc2B</i><br>(EHI_186860)  | Cdc2BSas           | ATTTATTTTTATTTCAATTTATATT                             | 94°C,45"; 47°C,45";<br>72°C,30"                 |
|                               | CloBSs             | GAAAACTCTATGTTTATAAAAAC                               |                                                 |
|                               | CloBSas            | CCAACAAAAATAAAATAACAAAC                               |                                                 |
|                               | Pr-CL2B A F        | TTACTAAACACAAGATAGAATAG                               | 94°C,45"; 51°C,45";<br>72°C,45"                 |
|                               | Pr-CL2B A R        | AAACTTGTCTTAGAGATAGTC                                 |                                                 |
|                               | Pr-CL2B B F        | ATATGTTTTAGTATTTCTCTG                                 | 94°C,45"; 46.5°C,45";<br>72°C,45"               |
|                               | Pr-CL2B B R        | TATATTTACTAGTTCTATTAATG                               |                                                 |
| EHI_169670                    | circRev169670      | GGCAAGAGAATTGATTGATTAAAG                              | 94°C,45"; 55°C,45";<br>72°C,30"                 |
|                               | circF169670        | CTATTATCTACACACTCATTTTC                               |                                                 |
|                               | circProbe Intron 1 | GGAGTATATTCAAAAATTAACAAACCTATAAAT<br>GATTAGTG         |                                                 |
|                               | circINT2Rev169670  | CAAATATTCTCCCCTCAACAACTC                              | 94°C,45"; 55°C,45";<br>72°C,30"                 |
|                               | circINT2F169670    | GAGTAAGTTAGTTCTTTAG                                   |                                                 |
|                               | circProbe Intron 2 | CATATATATAATAAAAAACAAACCTACAAATA<br>AG                |                                                 |
|                               | EHI169670_E2s      | AAGAAAGTTAATGATTCTGAGAAAGAG                           | 94°C,45"; 58°C,45";<br>72°C,45"                 |
|                               | EHI169670_E2as     | CTTCTTTTTCTTTTCTAATTCCTCACCC                          |                                                 |
|                               | Pr-169670 F        | TACCATTTATAGTAACATT                                   | 94°C,45"; 56°C,45";<br>72°C,45"                 |
|                               | Pr-169670 1 R      | CATTTGAAACCTAATAATATTGA                               |                                                 |
|                               | Pr-169670 ExU F    | AAGATAAAGAAATAGAAGATGCAGTTAAAG                        | 95°C,50"; 52°C,45";<br>72°C,50". Melt 52°C,0.5" |
|                               | Pr-169670 ExU R    | CTTCAGCAGCAACTGAAATTG                                 |                                                 |
|                               | circRev192510      | CATATGCTTCTTCATTTCTTC                                 | 94°C,45"; 55°C,45";                             |
|                               | circF192510        | GAGAAAGGAATGAGCCAAC                                   |                                                 |

|                        |                  |                                                    |                                                     |
|------------------------|------------------|----------------------------------------------------|-----------------------------------------------------|
| EHI_192510             | circProbe 192510 | CCATTTCTACTCTCATCTCCCCTATTATTTCTAC<br>CTTGAAATATGC | 72°C,30''                                           |
|                        | Pr-192510A F     | AAATCAATTCCAACACTAAC                               | 94°C,45''; 56°C,45'';<br>72°C,45''                  |
|                        | Pr-192510A R     | TTGAGACTTTCATCAATAAC                               |                                                     |
|                        | Pr-192510B F     | ATTACCATCTTCAATACAAGC                              | 94°C,45''; 58°C,45'';<br>72°C,45''                  |
|                        | Pr-192510B R     | TGACTTTAGTGCATTGATTC                               |                                                     |
|                        | Pr-192510 ExU F  | TATATCAAGATGGGAAAACTACAAAGATA                      | 95°C,50''; 52°C,45'';<br>72°C,50''. Melt 52°C,0.5'' |
|                        | Pr-192510 ExU R  | TGGCTTTGTCACTGTTGCTT                               |                                                     |
| EHI_014170             | circRev014170    | GAGAGTGTAGAAGGAGAG                                 | 94°C,45''; 55°C,45'';<br>72°C,30''                  |
|                        | circF014170      | GTTGGAAATACTCATTTTATTAG                            |                                                     |
|                        | circProbe 014170 | GAAGTGGTGATGGAGAAATAAAACAAACCTT<br>ATTTAATTC       |                                                     |
|                        | Pr-014170A F     | TGACTTTAGTGCATTGATTC                               | 94°C,45''; 54°C,45'';<br>72°C,45''                  |
|                        | Pr-014170A R     | TAACCAAAGAACGAACCTAAG                              |                                                     |
|                        | Pr-014170B F     | TCACTCAGTCCATATTGTTTC                              | 94°C,45''; 54°C,45'';<br>72°C,45''                  |
|                        | Pr-014170B R     | ATTTACCACATCTGATAGTGC                              |                                                     |
|                        | Pr-014170D F     | ATGAGAGCTGGACAAGTTC                                | 94°C,45''; 56°C,45'';<br>72°C,45''                  |
|                        | Pr-014170D R     | TAAGACTACCATTTGGTTTATTACC                          |                                                     |
|                        | Pr-014170E F     | TATGGTGAGACAAGTTGTAAG                              | 94°C,45''; 54°C,45'';<br>72°C,45''                  |
|                        | Pr-014170E R     | TCTATTTAGTCTGTTTATAGGAAC                           |                                                     |
|                        | Pr-014170F F     | ATTGTGAACAAAATGGATG                                | 94°C,45''; 51°C,45'';<br>72°C,45''                  |
|                        | Pr-014170F R     | TGTATTACGTTAGTAGTACTC                              |                                                     |
|                        | Pr-014170G F     | TATTCCTGTTCAAGTGAG                                 | 94°C,45''; 51°C,45'';<br>72°C,45''                  |
|                        | Pr-014170G R     | TATTGTCTCCAATATCTAGTC                              |                                                     |
|                        | Pr-014170 ExU F  | TAACTCAACAAAAGAAAATTCTCTTTAG                       | 95°C,50''; 50°C,45'';<br>72°C,50''. Melt 52°C,0.5'' |
|                        | Pr-014170 ExU R  | TTTCTTCTTTAATTCTTCAAGT                             |                                                     |
| EHI_042870             | Pr-042870 F      | TTTCATTCATAAAACAAGAAG                              | 94°C,45''; 49°C,45'';<br>72°C,45''                  |
|                        | Pr-042870 R      | AAATACATTGATGTCCAAG                                |                                                     |
| EHI_083590             | Pr-083590A F     | TTGATACATTTGATGGTCCTG                              | 94°C,45''; 55°C,45'';<br>72°C,45''                  |
|                        | Pr-083590A R     | AATAAAATAAACTGATGGTGAGG                            |                                                     |
|                        | Pr-083590B F     | TATTAGTTCTCAACTTAACTCACTTC                         | 94°C,45''; 55°C,45'';<br>72°C,45''                  |
|                        | Pr-083590B R     | TTTGAGGCTCTAACGAATTTGC                             |                                                     |
| EhRNF<br>(EHI_098590)  | Pr-098590F       | TAAACAAGATTCTCCAGGTG                               | 94°C,45''; 54°C,45'';<br>72°C,45''                  |
|                        | Pr-098590 R      | TTCTATTAACATCATTAGAAATAACTG                        |                                                     |
|                        | EHI_098590ExU F  | CCAGACTTTTTGATGTTAGAACAAAAACG                      | 95°C,50''; 52°C,45'';<br>72°C,50''. Melt 52°C,0.5'' |
|                        | EHI_098590ExU R  | TTGGAGGTGGGTATATCGT                                |                                                     |
| EhNudC<br>(EHI_023890) | P-nudc As1       | AACGCAACGATTTTGTTTTT                               | 95°C,50''; 45°C,45'';<br>72°C,45''                  |
|                        | P-nudc S 250     | TAAAGCACAAAAAATAATT                                |                                                     |
|                        | P-nudc AS 250    | AATTATTTTTTTGTGCTTTA                               | 95°C,50''; 45°C,45'';<br>72°C,45''                  |
|                        | P-nudc S 500     | CTATTATTTTATAGAGATT                                |                                                     |
|                        | Pr-023890 F      | GAAGATGTAACATTAACAATA                              | 95°C,50''; 50°C,45'';<br>72°C,50''. Melt 52°C,0.5'' |
|                        | Pr-023890 R      | GACTTCAATTATTTTCCAT                                |                                                     |
|                        | P-smc As1        | GTAATGATGGTTTATTTTCA                               | 95°C,50''; 45°C,45'';<br>72°C,45''                  |
|                        | P-smc S 250      | TGATCATTCCTATTATTGCT                               |                                                     |

|                                        |                |                                                 |                                                     |
|----------------------------------------|----------------|-------------------------------------------------|-----------------------------------------------------|
| EhSMC<br>(EHI_187190)                  | P-smc AS 250   | AGCAATAATAAGAATGATCA                            | 95°C,50''; 45°C,45'';<br>72°C,45''                  |
|                                        | P-smc S 500    | ATGGTATAAACACTCCTCTA                            |                                                     |
|                                        | Pr-187190 F    | GGATAAGACTCAATCTGAT                             | 95°C,50''; 48°C,45'';<br>72°C,50''. Melt 52°C,0.5'' |
|                                        | Pr-187190 R    | CATTCTATCTAAAACTCCTT                            |                                                     |
| Eh actin<br>(EHI_107290)               | EhActF         | GAGCTGTATTCCCATCCATTGTTG                        | 94°C,45'', 65°C,45'',<br>72°C,45''                  |
|                                        | EhActR         | CTTTCAGCAGTAGTGGTGAAAGC                         |                                                     |
| EhRNA polymerase<br>II<br>(EHI_121760) | Pol II F Xma I | ATCCCCCGGGATGACTGAACTCAACATGGAAA<br>CGAAAC      | 94°C,45'', 58.5 °C,30'', 72<br>°C,45'               |
|                                        | Pol II R Xho I | GCAACTCGAGTCATTTATCTTGCGGTTTAGGGA<br>ATATACTAGG |                                                     |
| EhRNA polymerase<br>II<br>(EHI_056690) | RNAPIIs        | GATCCAACATATCCTAAAACAACA                        | 94°C,45'', 60 °C,45'', 72<br>°C,45'                 |
|                                        | RNAPIIas       | TCAATTATTTTCTGACCCGTCCTC                        |                                                     |
| HSP70<br>(EHI_052860)                  | HSP70s         | GCAGAAGCTGAAAAGTTCAAGGC                         | 94°C,45'', 55 °C,45'', 72<br>°C,45''                |
|                                        | HSP70as        | CTTCTGCAGCAATCTTATCAGCAAA                       |                                                     |
| U6 snRNA<br>(EHU43841)                 | EhU6 F         | GGATCCACTTCGGTGAAAAT                            | 94°C,45'', 62°C,45'',<br>72°C,30''                  |
|                                        | EhU6 R         | CTTCTCGTATGAGCGTGTCATC                          |                                                     |
| U2 snRNA<br>(BK006130)                 | T7U2           | GCATGCTAATACGACTTCTCGGCCTTTATG                  | 94°C,45'', 60°C,45'',<br>72°C,45''                  |
|                                        | hU2siR         | TAACAGATCTTGTTTCCATGCACATCCTCG                  |                                                     |
| pEhExHA<br>(Cysteine synthase)         | CS+116         | AGAATAGACTCTCATCAA                              | 94°C,45'', 55°C,45'',<br>72°C,45''                  |
|                                        | CS-103         | GCTTTGTAACATCTTCTTGC                            |                                                     |
| pCR2.1                                 | M13F           | GTAAACGACGGCCAGT                                | 94°C,45'', 53°C,45'',<br>72°C,45''                  |
|                                        | M13R           | CAGGAAACAGCTATGACC                              |                                                     |

| Amplicon length                    |
|------------------------------------|
|                                    |
| US = 510 bp                        |
| S = 374 bp                         |
| flicX13 = 116 bp                   |
| flicX13 = 79 bp<br>(using Rab2BSs) |
| Promoter = 215 bp                  |
|                                    |
| flicL12 = 100 bp                   |
| flicS14 ≈ 69 bp                    |
| flicCl2B ≈ 79 bp                   |
| Promoter = 341 bp                  |
| Promoter = 349 bp                  |
| flic670i1 = 110 bp                 |
| flic670i2 = 100 bp                 |
| circ670e2= 354 bp                  |
| Promoter = 125 bp                  |
| 182 pb                             |
| flic510= 73 bp                     |

|                   |
|-------------------|
|                   |
| Promoter = 347 bp |
| Promoter = 257 bp |
| 178 pb            |
| flic170= 113 bp   |
| Promoter = 278 bp |
| Promoter = 455 bp |
| Promoter = 364 bp |
| Promoter = 321 bp |
| Promoter = 479 bp |
| Promoter = 354 bp |
| 186 pb            |
| Promoter = 283 bp |
| Promoter = 365 bp |
| Promoter = 392 bp |
| Promoter = 399 bp |
| 121 bp            |
| Promoter = 250 bp |
| Promoter = 250 bp |
| 189 pb            |
| Promoter = 250 bp |

|                   |
|-------------------|
| Promoter = 250 bp |
| 190 pb            |
| 535 bp            |
| 4911 bp           |
| 204 bp            |
| 150 bp            |
| 92 bp             |
| 200 bp            |
| -                 |
| -                 |
