# Supplementary material for: Promoter-Bound Full-Length Intronic Circular RNAs-RNA Polymerase II Complexes Regulate Gene Expression in the Human Parasite Entamoeba histolytica
Source: MDPI journal article supplement (doi:10.3390/ncrna8010012), 2022-01-27
Supplement: s1 [file s1]

**Table S1. *Entamoeba invadens* orthologs and paralogs of *E. histolytica* virulence-related genes; p, *E. histolytica* paralogs. Stage conversion transcriptomic data is shown. Shaded in green appear the loci in which circRNAs have been identified.**

| <i>E. histolytica</i> | <i>E. Invadens</i>                                                                                                           | Paralogs                                                                                                                      |                                                                                                                               |  |
|-----------------------|------------------------------------------------------------------------------------------------------------------------------|-------------------------------------------------------------------------------------------------------------------------------|-------------------------------------------------------------------------------------------------------------------------------|--|
| EHI_169670 (p)        | EIN_391640                                                                                                                   | EIN_186580                                                                                                                    |                                                                                                                               |  |
| EHI_014170 (p)        | 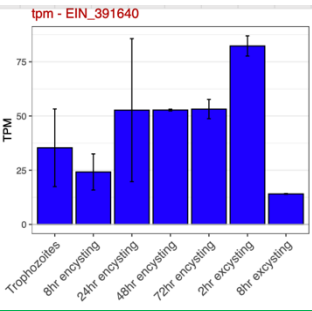 <p>tpm - EIN_391640</p> <p>EIN_391640</p>  |  <p>tpm - EIN_186580</p> <p>EIN_186580</p>  |  <p>tpm - EIN_419420</p> <p>EIN_419420</p> |  |
| EHI_042870            |  <p>tpm - EIN_174510</p> <p>EIN_174510</p> |  <p>tpm - EIN_154240</p> <p>EIN_154240</p> |                                                                                                                               |  |

|            |                                                                                                           |                                                                                                            |                                                                                                             |                                                                                                             |
|------------|-----------------------------------------------------------------------------------------------------------|------------------------------------------------------------------------------------------------------------|-------------------------------------------------------------------------------------------------------------|-------------------------------------------------------------------------------------------------------------|
| EHI_083590 | <p>tpm - EIN_490890</p> 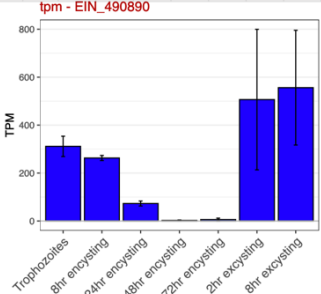 |                                                                                                            |                                                                                                             |                                                                                                             |
| EHI_192510 | <p>tpm - EIN_043460</p>  | <p>tpm - EIN_083010</p>  | <p>tpm - EIN_372380</p>  | <p>tpm - EIN_508660</p>  |
